# Supplementary material for: Development of a Minimalistic Physiologically Based Pharmacokinetic (mPBPK) Model for the Preclinical Development of Spectinamide Antibiotics
Source: MDPI journal article supplement (doi:10.3390/pharmaceutics15061759), 2023-06-17
Supplement: s1 [file s1]

**Pharmaceutics**

**Supplementary Materials: Development of a  
Minimalistic Physiologically-Based  
Pharmacokinetic (mPBPK) Model for the  
Preclinical Development of Spectinamide  
Antibiotics**

**Keyur R. Parmar, Pradeep B. Lukka, Santosh Wagh, Zaid H. Temrikar, Jiuyu Liu,  
Richard E. Lee, Miriam Braunstein, Anthony J. Hickey, Gregory T. Robertson,  
Mercedes Gonzalez-Juarrero, Andrea Edginton and Bernd Meibohm**

Linear ordinary differential equations used to describe spectinamide concentrations in the different components of the developed minimalistic physiologically-based pharmacokinetic model:

### Venous blood compartment

$$V^{Venous\ Blood} \times \frac{d}{dt} C^{Venous\ Blood} = Q^{Liver} \times Cb^{Liver} + Q^{Kidney} \times Cb^{Kidney} + Q^{Other} \times Cb^{Other} - Q^{Lung} \times Cb^{Lung} \quad (S1)$$

Venous plasma

$$C^{Venous\ Plasma} = \frac{C^{Venous\ Blood}}{k(b/p)} \quad (S2)$$

### Lung compartment

Lung rapid equilibrium sub-compartment

$$\begin{aligned} & \left( V_{Vascular}^{Lung} + \left( \frac{V_{Interstitial}^{Lung}}{k(b/p)} \right) \right) \times \frac{d}{dt} Cb^{Lung} \\ &= Q_{Lung} \times (C^{Venous\ Blood} - Cb^{Lung}) - K_{I \rightarrow C}^{Lung} \times fu \times Cb^{Lung} \\ & \times \left( V_{Vascular}^{Lung} + \left( \frac{V_{Interstitial}^{Lung}}{k(b/p)} \right) \right) + K_{C \rightarrow I}^{Lung} \times C_{Cellular}^{Lung} \times V_{Cellular}^{Lung} \end{aligned} \quad (S3)$$

Lung cellular sub-compartment

$$\begin{aligned} & V_{Cellular}^{Lung} \times \frac{d}{dt} C_{Cellular}^{Lung} \\ &= K_{I \rightarrow C}^{Lung} \times fu \times Cb^{Lung} \times \left( V_{Vascular}^{Lung} + \left( \frac{V_{Interstitial}^{Lung}}{k(b/p)} \right) \right) - K_{C \rightarrow I}^{Lung} \times C_{Cellular}^{Lung} \times V_{Cellular}^{Lung} \end{aligned} \quad (S4)$$

Lung tissue

$$C^{Lung} = \frac{\left( Cb^{Lung} \times \left( V_{Vascular}^{Lung} + \left( \frac{V_{Interstitial}^{Lung}}{k(b/p)} \right) \right) + C_{Cellular}^{Lung} \times V_{Cellular}^{Lung} \right)}{V^{Lung}} \quad (S5)$$

### Arterial blood compartment

$$V^{Arterial\ Blood} \times \frac{d}{dt} C^{Arterial\ Blood} = Q^{Lung} \times (Cb^{Lung} - C^{Arterial\ Blood}) \quad (S6)$$

## Spleen compartment

*Spleen rapid equilibrium sub-compartment*

$$\begin{aligned}
 & \left( V_{Vascular}^{Spleen} + \left( \frac{V_{Interstitial}^{Spleen}}{k(b/p)} \right) \right) \times \frac{d}{dt} Cb^{Spleen} \\
 &= Q_{Spleen} \times (C^{Arterial\ Blood} - Cb^{Spleen}) - K_{I \rightarrow C}^{Spleen} \times fu \times Cb^{Spleen} \\
 & \times \left( V_{Vascular}^{Spleen} + \left( \frac{V_{Interstitial}^{Spleen}}{k(b/p)} \right) \right) + K_{C \rightarrow I}^{Spleen} \times C_{Cellular}^{Spleen} \times V_{Cellular}^{Spleen}
 \end{aligned} \tag{S7}$$

*Spleen cellular sub-compartment*

$$\begin{aligned}
 & V_{Cellular}^{Spleen} \times \frac{d}{dt} C_{Cellular}^{Spleen} \\
 &= K_{I \rightarrow C}^{Spleen} \times fu \times Cb^{Spleen} \times \left( V_{Vascular}^{Spleen} + \left( \frac{V_{Interstitial}^{Spleen}}{k(b/p)} \right) \right) - K_{C \rightarrow I}^{Spleen} \times C_{Cellular}^{Spleen} \\
 & \times V_{Cellular}^{Spleen}
 \end{aligned} \tag{S8}$$

*Spleen tissue*

$$C^{Spleen} = \frac{\left( Cb^{Spleen} \times \left( V_{Vascular}^{Spleen} + \left( \frac{V_{Interstitial}^{Spleen}}{k(b/p)} \right) \right) + C_{Cellular}^{Spleen} \times V_{Cellular}^{Spleen} \right)}{V^{Spleen}} \tag{S9}$$

## Liver compartment

*Liver rapid equilibrium sub-compartment*

$$\begin{aligned}
 & \left( V_{Vascular}^{Liver} + \left( \frac{V_{Interstitial}^{Liver}}{k(b/p)} \right) \right) \times \frac{d}{dt} Cb^{Liver} \\
 &= Q_{Liver} \times (C^{Arterial\ Blood} - Cb^{Liver}) + Q_{Spleen} \times Cb^{Spleen} - K_{I \rightarrow C}^{Liver} \times fu \times Cb^{Liver} \\
 & \times \left( V_{Vascular}^{Liver} + \left( \frac{V_{Interstitial}^{Liver}}{k(b/p)} \right) \right) + K_{C \rightarrow I}^{Liver} \times C_{Cellular}^{Liver} \times V_{Cellular}^{Liver}
 \end{aligned} \tag{S10}$$

*Liver cellular sub-compartment*

$$\begin{aligned}
 & V_{Cellular}^{Liver} \times \frac{d}{dt} C_{Cellular}^{Liver} \\
 &= K_{I \rightarrow C}^{Liver} \times fu \times Cb^{Liver} \times \left( V_{Vascular}^{Liver} + \left( \frac{V_{Interstitial}^{Liver}}{k(b/p)} \right) \right) - K_{C \rightarrow I}^{Liver} \times C_{Cellular}^{Liver} \times V_{Cellular}^{Liver}
 \end{aligned} \tag{S11}$$

*Liver tissue*

$$C^{Liver} = \frac{\left( Cb^{Liver} \times \left( V_{Vascular}^{Liver} + \left( \frac{V_{Interstitial}^{Liver}}{k(b/p)} \right) \right) + C_{Cellular}^{Liver} \times V_{Cellular}^{Liver} \right)}{V^{Liver}} \quad (S12)$$

## Kidney compartment

*Kidney rapid equilibrium sub-compartment*

$$\begin{aligned} & \left( V_{Vascular}^{Kidney} + \left( \frac{V_{Interstitial}^{Kidney}}{k(b/p)} \right) \right) \times \frac{d}{dt} Cb^{Kidney} \\ &= Q_{Kidney} \times (C^{Arterial Blood} - Cb^{Kidney}) - K_{I \rightarrow C}^{Kidney} \times fu \times Cb^{Kidney} \\ & \times \left( V_{Vascular}^{Kidney} + \left( \frac{V_{Interstitial}^{Kidney}}{k(b/p)} \right) \right) - GFR \times fu \times Cb^{Kidney} + K_{C \rightarrow I}^{Kidney} \times C_{Cellular}^{Kidney} \times V_{Cellular}^{Kidney} \end{aligned} \quad (S13)$$

*Kidney cellular sub-compartment*

$$\begin{aligned} & V_{Cellular}^{Kidney} \times \frac{d}{dt} C_{Cellular}^{Kidney} \\ &= K_{I \rightarrow C}^{Kidney} \times fu \times Cb^{Kidney} \times \left( V_{Vascular}^{Kidney} + \left( \frac{V_{Interstitial}^{Kidney}}{k(b/p)} \right) \right) - K_{C \rightarrow I}^{Kidney} \times C_{Cellular}^{Kidney} \\ & \times V_{Cellular}^{Kidney} \end{aligned} \quad (S14)$$

*Kidney tissue*

$$C^{Kidney} = \frac{\left( Cb^{Kidney} \times \left( V_{Vascular}^{Kidney} + \left( \frac{V_{Interstitial}^{Kidney}}{k\left(\frac{b}{p}\right)} \right) \right) + C_{Cellular}^{Kidney} \times V_{Cellular}^{Kidney} \right)}{V^{Kidney}} \quad (S15)$$

## Other tissue compartment

*Other tissue rapid equilibrium sub-compartment*

$$\begin{aligned} & \left( V_{Vascular}^{Other} + \left( \frac{V_{Interstitial}^{Other}}{k(b/p)} \right) \right) \times \frac{d}{dt} Cb^{Other} \\ &= Q_{Other} \times (C^{Arterial Blood} - Cb^{Other}) - K_{I \rightarrow C}^{Other} \times fu \times Cb^{Other} \\ & \times \left( V_{Vascular}^{Other} + \left( \frac{V_{Interstitial}^{Other}}{k(b/p)} \right) \right) + K_{C \rightarrow I}^{Other} \times C_{Cellular}^{Other} \times V_{Cellular}^{Other} \end{aligned} \quad (S16)$$

Other tissue cellular sub-compartment

$$V_{Cellular}^{Other} \times \frac{d}{dt} C_{Cellular}^{Other} = K_{I \rightarrow C}^{Other} \times fu \times Cb^{Other} \times \left( V_{Vascular}^{Other} + \left( \frac{V_{Interstitial}^{Other}}{k(b/p)} \right) \right) - K_{C \rightarrow I}^{Other} \times C_{Cellular}^{Other} \times V_{Cellular}^{Other} \quad (S17)$$

Other tissue

$$C^{Other} = \frac{\left( Cb^{Other} \times \left( V_{Vascular}^{Other} + \left( \frac{V_{Interstitial}^{Other}}{k(b/p)} \right) \right) + C_{Cellular}^{Other} \times V_{Cellular}^{Other} \right)}{V^{Other}} \quad (S18)$$

## Subcutaneous Dosing

$$V_{Depot}^{Subcutaneous} = 50 \mu L \quad (S19)$$

$$C_{Depot}^{Subcutaneous} = \frac{F \times Dose}{V_{Depot}^{Subcutaneous}} \quad (S20)$$

$$V_{Depot}^{Subcutaneous} \times \frac{d}{dt} C_{Depot}^{Subcutaneous} = -Ka \times C_{Depot}^{Subcutaneous} \quad (S21)$$

## Intra-Pulmonary Aerosol (IPA) Dosing

Dosing depot

$$V_{Depot}^{IPA} \times \frac{d}{dt} C_{Depot}^{IPA} = -Ka \times C_{Depot}^{IPA} \quad (S22)$$

ELF sub-compartment

$$\begin{aligned} V^{ELF} \times \frac{d}{dt} C^{ELF} = & Ka \times C_{Depot}^{IPA} \times V_{Depot}^{IPA} - K_{ELF \rightarrow C} \times fu^{ELF} \times C^{ELF} \times V^{ELF} + K_{C \rightarrow I}^{Lung} \times C_{Cellular}^{Lung} \times V_{Cellular}^{Lung} \\ & - K_{ELF \rightarrow B} \times fu^{ELF} \times C^{ELF} \times V^{ELF} + K_{ELF \rightarrow B} \times fu \times Cb^{Lung} \\ & \times \left( V_{Vascular}^{Lung} + \left( \frac{V_{Interstitial}^{Lung}}{k(b/p)} \right) \right) \end{aligned} \quad (S23)$$

Modified lung cellular sub-compartment

$$\begin{aligned} V_{Cellular}^{Lung} \times \frac{d}{dt} C_{Cellular}^{Lung} = & K_{I \rightarrow C}^{Lung} \times fu \times Cb^{Lung} \times \left( V_{Vascular}^{Lung} + \left( \frac{V_{Interstitial}^{Lung}}{k(b/p)} \right) \right) - K_{C \rightarrow I}^{Lung} \times C_{Cellular}^{Lung} \times V_{Cellular}^{Lung} \\ & + K_{ELF \rightarrow C} \times fu^{ELF} \times C^{ELF} \times V^{ELF} \end{aligned} \quad (S24)$$

Modified lung rapid equilibrium sub-compartment

$$\begin{aligned}
& \left( V_{Vascular}^{Lung} + \left( \frac{V_{Interstitial}^{Lung}}{k(b/p)} \right) \right) \times \frac{d}{dt} Cb^{Lung} \\
&= Q_{Lung} \times (C^{Venous\ Blood} - Cb^{Lung}) - K_{I \rightarrow C}^{Lung} \times fu \times Cb^{Lung} \\
&\times \left( V_{Vascular}^{Lung} + \left( \frac{V_{Interstitial}^{Lung}}{k(b/p)} \right) \right) + K_{C \rightarrow I}^{Lung} \times C_{Cellular}^{Lung} \times V_{Cellular}^{Lung} + K_{ELF \rightarrow B} \times fu^{ELF} \times C^{ELF} \quad (S25) \\
&\times V^{ELF} - K_{ELF \rightarrow B} \times fu \times Cb^{Lung} \times \left( V_{Vascular}^{Lung} + \left( \frac{V_{Interstitial}^{Lung}}{k(b/p)} \right) \right)
\end{aligned}$$

Modified lung tissue

$$C^{Lung} = \frac{\left( Cb^{Lung} \times \left( V_{Vascular}^{Lung} + \left( \frac{V_{Interstitial}^{Lung}}{k(b/p)} \right) \right) + C_{Cellular}^{Lung} \times V_{Cellular}^{Lung} + C^{ELF} \times V^{ELF} \right)}{V^{Lung}} \quad (S26)$$

**Table S1.** Model input parameters for the model development of spectinamide 1599 within the Simcyp simulator.

| Parameters                  | Values     |
|-----------------------------|------------|
| MW (g/mol)                  | 486.95     |
| Log $P_{O:W}$               | -2.52      |
| pKa                         | 8.69, 6.95 |
| $f_{u^{Plasma}}$            | 0.436      |
| $k(b/p)$                    | 0.693      |
| CL <sub>R</sub> (L/h)       | 3.27       |
| $P_{eff}$ ( $10^{-4}$ cm/s) |            |
| • Mass to ISF               |            |
| • Blood to ISF              |            |
| • Rim-mass to ISF           | 13.89      |
| • OC to ISF                 |            |
| • IC to OC                  |            |

MW represents molecular weight (g/mol); Log  $P_{O:W}$  represents lipophilicity; pKa represents acid dissociation constant;  $k(b/p)$  represents blood to plasma ratio; and  $f_{u^{Plasma}}$  represents fraction unbound in plasma; CL<sub>R</sub> is renal clearance;  $P_{eff}$  is effective permeability, ISF is interstitial fluid, OC is outer caseum; IC is inner caseum.
